# Supplementary material for: Coastal complexity: Ancient human diets inferred from Bayesian stable isotope mixing models and a primate analogue
Source: PLoS One. 2018 Dec 20;13(12):e0209411. doi: 10.1371/journal.pone.0209411 (PMC6301609; doi:10.1371/journal.pone.0209411)
Supplement: S1 Table — (XLSX) [file pone.0209411.s001.xlsx]

## Sheet: Lewis&Sealy S1 Table
UCT no.	Accession Number	ID (this study)	Locality	δ13C	δ15N	%C	%N	Atomic C:N	Sex	Laboratory identifiers	Date (B.P.)	Std. dev.
1683	SAM-AP 5041	1	Melkbosch	-17.9	10.2	42	15	3.3	F	Pta-4376	2010	50
1691	SAM-AP 4637	2	Gordon's Bay	-17.2	10.5	42.4	15.2	3.2	F	Pta-4803	3880	50
1761.2	SAM-AP 6041.2	3	Milnerton	-15.7	12.7	42.6	15.5	3.2	M	Pta-4768	2010	45
1688	SAM-AP 4943	4	Kommetjie	-15.2	12.3	40.9	14.7	3.2	F	Pta-4821	2610	50
1754	SAM-AP 37	5	Blouberg	-14.9	13.1	42.8	15.1	3.3	N	Pta-4353	6120	70
1903	UCT 248	6	Noordhoek	-14.2	14.1	42.8	15.1	3.3	F	GX-13185	4730	95
1737	SAM-AP 1157	7	Blouberg	-13.8	13.5	42.3	15.2	3.3	F	Pta-4217	2420	60
1743	SAM-AP 4636	8	Blouberg	-13.5	12.7	43.3	15.2	3.3	M	Pta-4379	2130	45
1763	SAM-AP 6083	9	Milnerton	-13.4	14	43.6	15.4	3.3	F	Pta-4358	2000	50
8074	Not accessioned	10	Blouberg	-13.3	15.5	42.9	15.2	3.3	M	TO-8952	2120	60
1749	SAM-AP 4306	11	Noordhoek	-13.3	15	41.7	14.9	3.3	F	Pta-4350	2210	50
4444	UCT 169	12	Hout Bay	-13.2	15.2	45.2	15.8	3.3	F	Pta-5694	2320	50
15290	Not accessioned	13	Blouberg	-13.1	14.3	42.2	15.3	3.2	M	OxA-29562	2387	29
20083	Not accessioned	14	Melkbosch	-13	11.3	43	13.2	3.2	M	Beta-433874	2060	30
1723	SAM-AP 1441	15	Melkbosch	-13	15.9	43.3	15.2	3.3	M	Pta-4201	2170	60
1689	SAM-AP 4942	16	Kommetjie	-12.6	15.3	41.9	15	3.3	F	Pta-4829	2220	45
1748	SAM-AP 4305	17	Noordhoek	-12.5	16.3	43.5	15.2	3.3	M	Pta-4660	2100	45
13944	UCT 609	18	Hout Bay	-12.5	14.9	42.7	15.5	3.2	M	OxA-27133	2303	29
8076	SAM-AP 5036	19	Melkbosch	-12.5	15.2	43.7	15.2	3.4	M	Pta-8445	2960	60
1747A	SAM-AP 4304A	20	Noordhoek	-12.3	17.3	43	15.1	3.3	N	Pta-4656	2220	50
1753	SAM-AP 1149	21	Blouberg	-12.3	14.3	42.9	15.2	3.3	M	Pta-4690	3970	50
1897	SAM-AP 6023	22	Melkbosch	-12.2	15.2	no data	no data	no data	M	GX-13180	2355	85
1758	SAM-AP 4720	23	Kommetjie	-12.1	15.5	41.6	15	3.2	M	GX-13179	2195	80
4443	UCT 158	24	Sandy Bay	-12.1	14.5	42.6	15.4	3.2	F	Pta-5686	3190	60
2170	UCT 229	25	Melkbosch	-12	15.7	43	15.4	3.3	M	Pta-928	3220	55
1049	SAM-AP 1443	26	Gordon's Bay	-11.8	15.5	no data	no data	no data	M	Pta-2309	2050	50
1750	SAM-AP 4308	27	Noordhoek	-11.8	16.4	42.5	15.3	3.2	M	Pta-4404	2170	60
1747B	SAM-AP 4304B	28	Noordhoek	-11.7	16.2	41.8	14.7	3.3	J	Pta-4391	2070	50
1751	SAM-AP 4309	29	Noordhoek	-11.7	16.1	43.5	15.4	3.3	F	Pta-4385	2120	45
1682	SAM-AP 5082	30	Hout Bay	-11.6	15.9	42.4	15.4	3.2	M	Pta-4199	2150	60
4446	UCT 220	31	Blouberg	-11.5	16.5	42.4	15.4	3.2	M	Pta-5678	2100	21
12903	SAM-AP 4692	32	Peers Cave	-11.3	16.4	42.2	14.6	3.4	M	OxA-17376	6891	37
1741B	SAM-AP 4203b	33	Kommetjie	-11.2	15.8	no data	no data	no data	N	Pta-4798	4760	50
1746	SAM-AP 5075	34	Cape Point	-10.6	16.7	41.9	15.2	3.2	M	Pta-4669	2530	60
1741A	SAM-AP 4203a	35	Kommetjie	-10.6	15.8	41.1	14.3	3.4	N	Pta-4412	2590	50
